# Supplementary material for: MOF-derived nanozymes loaded with botanicals as multifunctional nanoantibiotics for synergistic treatment of intracellular antibiotic-resistant bacterial infection
Source: Royal Society of Chemistry journal article supplement (doi:10.1039/d5nh00137d), 2025-01-01
Supplement: d5nh00137d1.pdf [file d5nh00137d1.pdf]

# **MOF-derived nanozyme loaded with botanicals as multifunctional nanoantibiotics for synergistic treatment of intracellular antibiotic-resistant bacterial infection**

Yaling Liu,<sup>a</sup> Shuwen Sun,<sup>a</sup> Chunyao Shang,<sup>a</sup> Rongji Liu,<sup>a</sup> Chenhao Zhang,<sup>a</sup> Jing Yu,<sup>a</sup> Kai Dong,<sup>\*a,b,c</sup> Chen Xu<sup>\*a,b</sup> and Fangfang Cao<sup>\*d</sup>

<sup>a</sup>College of Chinese Medicinal Materials, Jilin Agricultural University, Changchun 130118, China

<sup>b</sup>National & Local Joint Engineering Research Center for Ginseng Breeding and Development, Changchun 130118, China

<sup>c</sup>Jilin Provincial International Joint Research Center for the Development and Utilization of Authentic Medicinal Materials, Jilin Agricultural University, Changchun 130118, China

<sup>d</sup>Key Laboratory of Big Data-Based Precision Medicine of Ministry of Industry and Information Technology, School of Engineering Medicine, Beihang University, Beijing, 100191, China.

Corresponding Author: \*Correspondence should be addressed to Kai Dong (dongkai@jlau.edu.cn), Chen Xu (E-mail: xuchen@jlau.edu.cn) and Fangfang Cao (E-mail: [fangfangcao@buaa.edu.cn](mailto:fangfangcao@buaa.edu.cn)).

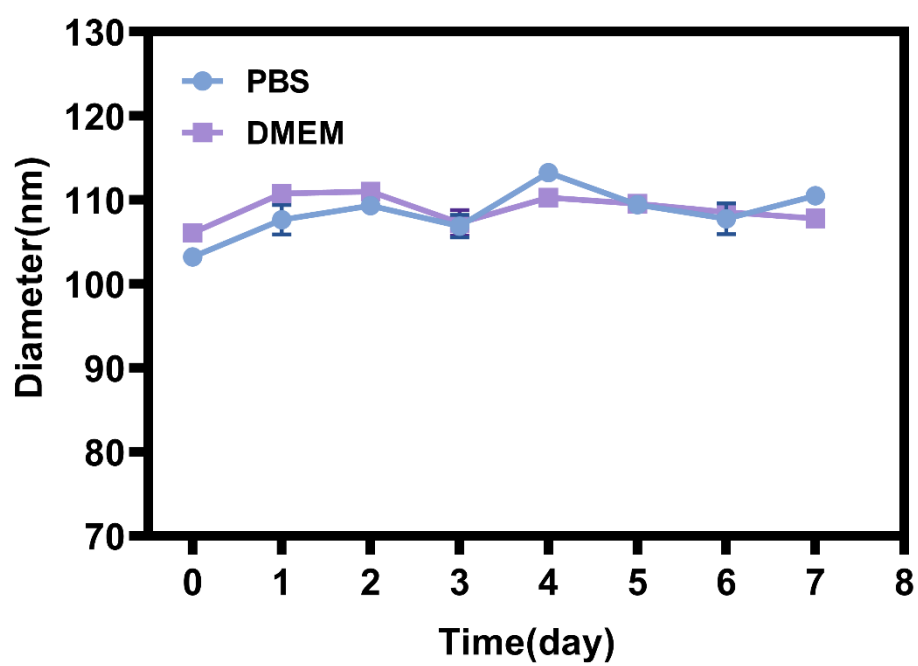

Figure S1 Stability of GZNC.

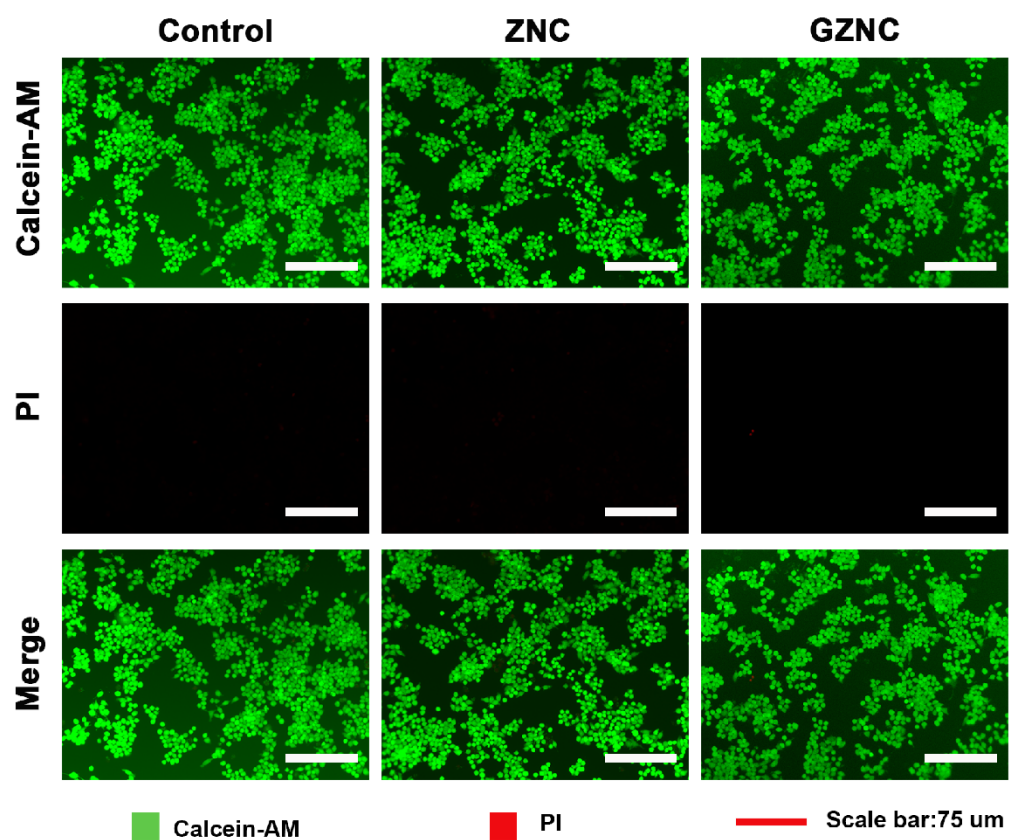

Figure S2 Fluorescence images of RAW 264.7 cells co-stained with Calcein AM/PI.

**A**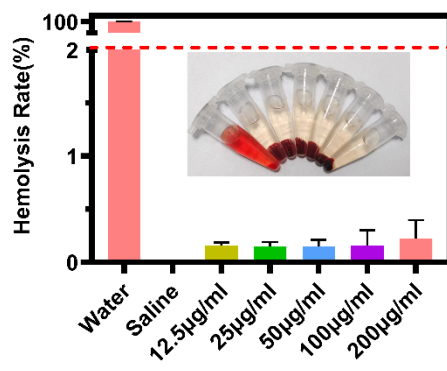**B**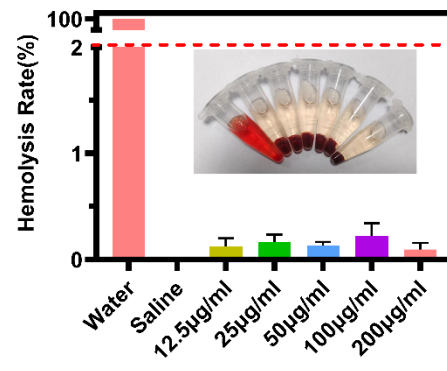

Figure S3 Relative hemolysis rate of mouse erythrocytes after incubation with different concentrations of (A) ZNC and (B) GZNC for 4 h.

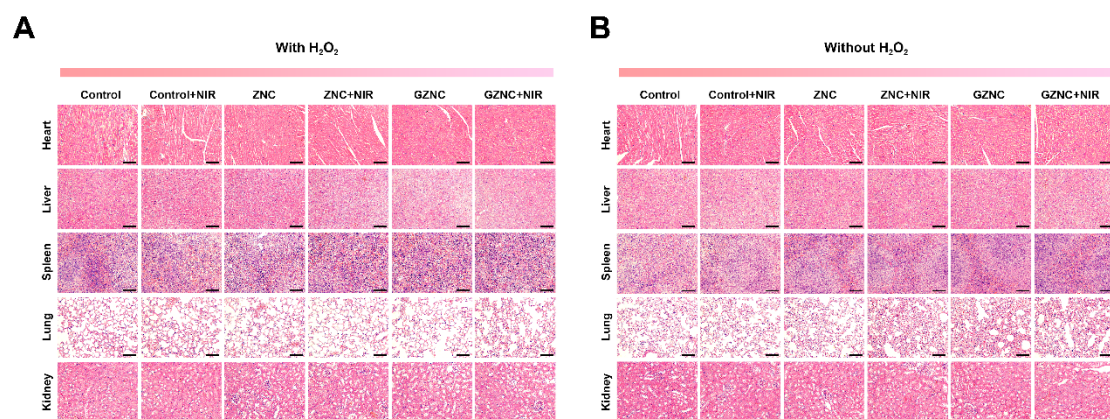

Figure S4 (A, B) H&E staining images of major organs. Scale bar: 100  $\mu$ m.
